# Supplementary material
Source: PubMed Central journal article supplement (PMC6442575)
Supplement: pnas.1822176116.sapp.pdf [file pnas.1822176116.sapp.pdf]

Supplementary Information for

**The RBFox2-miR-34a-Jph2 Axis Contributes to Cardiac  
Decompensation during Heart Failure**

Jing Hu, Chen Gao, Chaoliang Wei, Yuanchao Xue, Changwei Shao, Yajing Hao, Lan-Tao Gou, Yu Zhou, Jianlin Zhang, Shuxun Ren, Ju Chen, Yibin Wang and Xiang-Dong Fu

Corresponding authors: Chaoliang Wei, Yibin Wang and Xiang-Dong Fu  
Emails: weicl@szu.edu.cn, YibinWang@mednet.ucla.edu and xdfu@ucsd.edu

**This PDF file includes:**

Figs. S1 to S4  
Tables S1 to S2

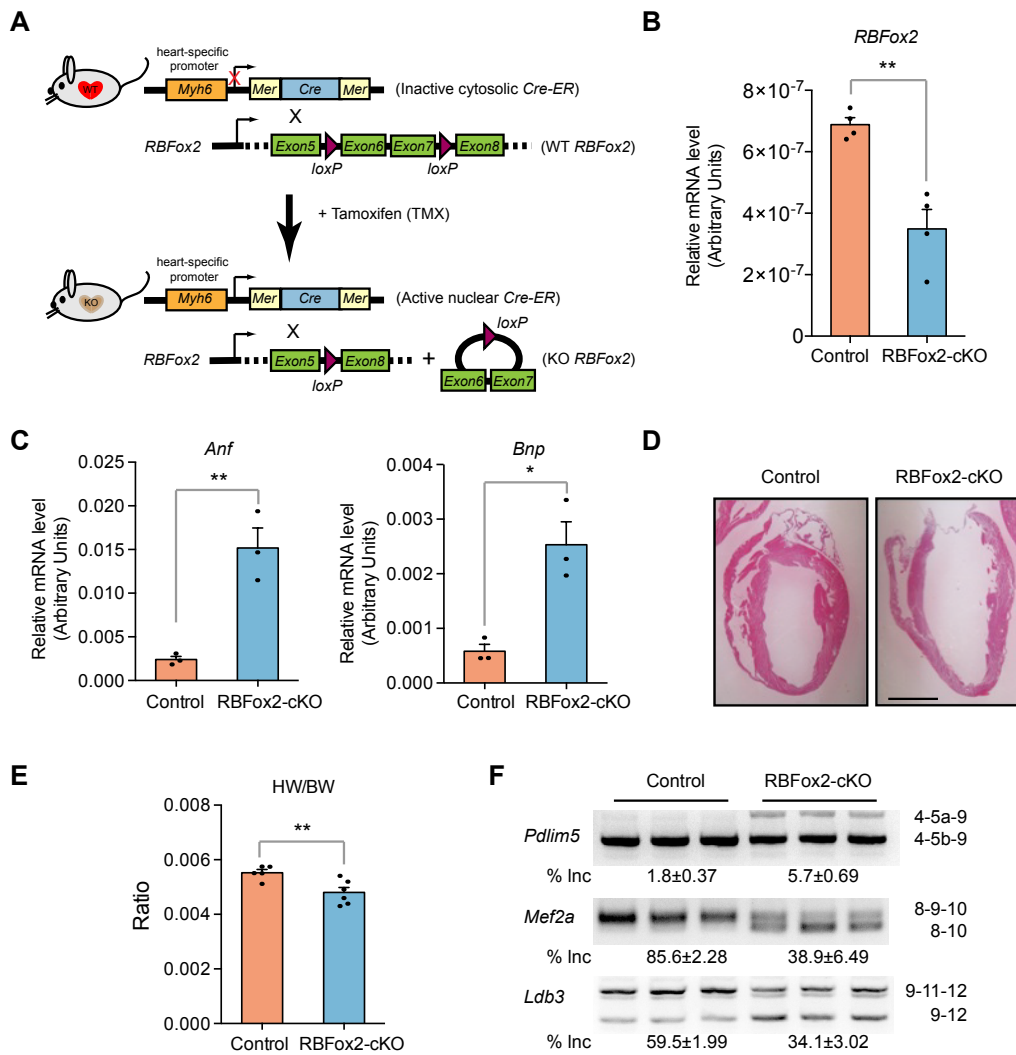

**Fig. S1. Heart failure in tamoxifen-induced *RBFox2* knockout mice.** (A) Scheme for generating *RBFox2-cKO* mice and induced recombination by tamoxifen. (B) Quantitative analysis of *RBFox2* mRNA expression in control and *RBFox2-cKO* groups; n=3 for each group, \* $P < 0.05$ , \*\* $P < 0.01$ . (C) Quantitative analysis of atrial natriuretic factor (*Anf*) and brain natriuretic protein (*Bnp*) mRNA expression in control and *RBFox2-cKO* groups; n=3 for each group, \* $P < 0.05$ , \*\* $P < 0.01$ . (D-E) Representative cross-sectional images of H&E stained heart (D) and analysis of heart weight (HW) / body weight (BW) ratio (E) from control and *RBFox2-cKO* mice after 2-week tamoxifen treatment; n=8 for control, n=9 for *RBFox2-cKO*, \*\* $P < 0.01$ . Scale bar: 2mm. (F) Semi-quantitative RT-PCR analysis of alternative splicing of representative cardiac genes in WT and *RBFox2-cKO* cardiomyocytes. Shown at the bottom of each gel image are the percentages of splice-in (included exon divided by both isoforms) calculated based on three biological repeats.

**A****Statistics of CLIP-seqs**

| Sample            | Raw        | Trimmed    | m1         | Mapping Ratio | m1u1      | Cell type           |
|-------------------|------------|------------|------------|---------------|-----------|---------------------|
| Ago2-RBFox2-WT-CM | 39,666,870 | 26,566,050 | 22,178,243 | 0.83          | 4,381,810 | Cardiomyocytes (W9) |
| Ago2-RBFox2-KO-CM | 21,596,619 | 14,362,095 | 12,274,069 | 0.85          | 4,282,752 | Cardiomyocytes (W9) |

**B**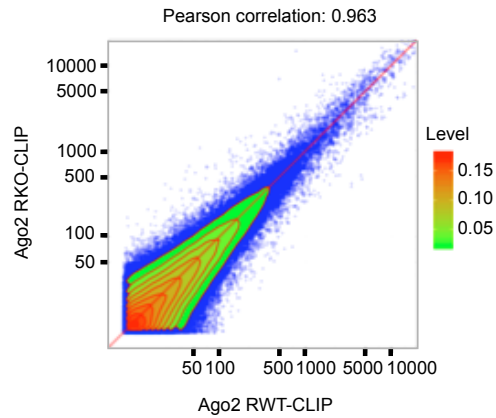

**Fig. S2. Genome-wide analysis of Ago2-RNA interactions in the heart.** (A) Ago2 crosslinking immunoprecipitation sequencing (CLIP-seq) performed on isolated WT or *RBFox2*<sup>-/-</sup> cardiomyocytes from 9 week-old mice. (B) Correlation between the Ago2 CLIP-seq data generated with WT and *RBFox2*<sup>-/-</sup> cardiomyocytes isolated from 9 week-old mice.



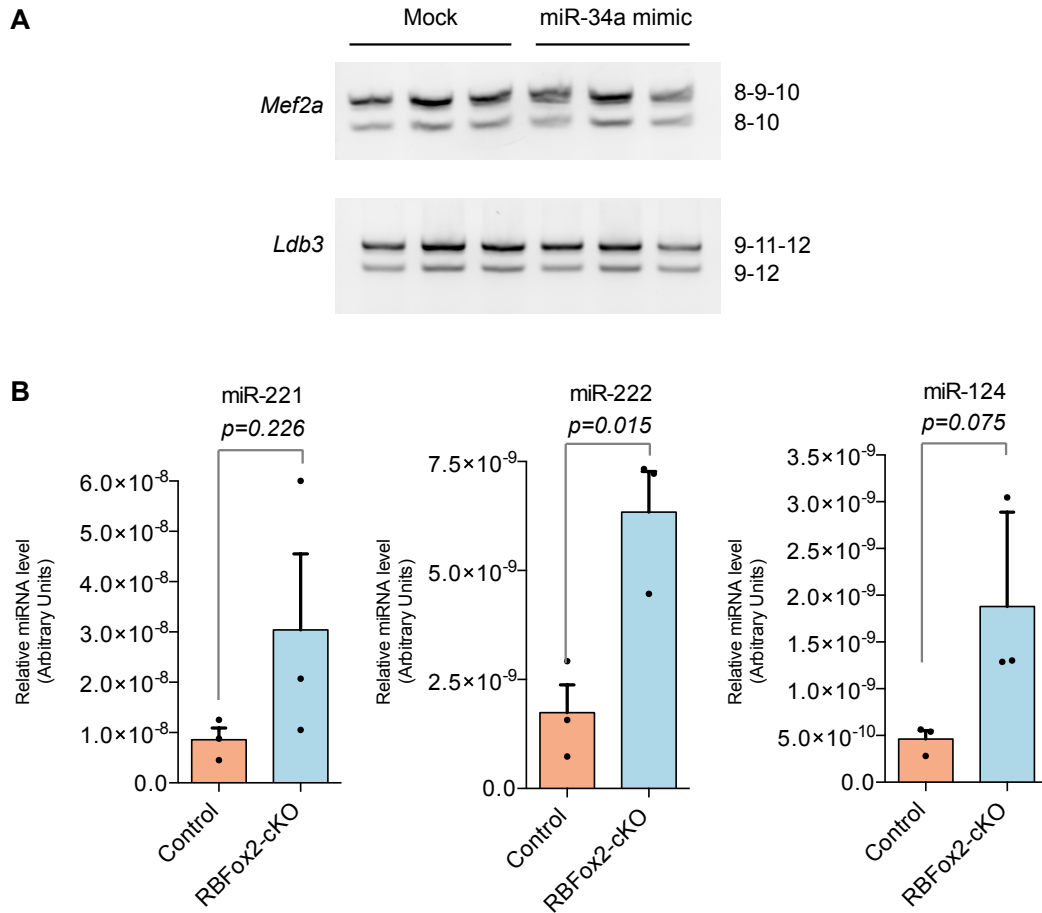

**Fig. S4. Impact of miR-34a mimic on alternative splicing and induction of additional miRNAs in the heart of *RBFox2-cKO* mice.** (A) Alternative splicing of two *RBFox2*-regulated genes in the hearts treated with mock or miR-34a mimic. (B) RT-qPCR analysis of three representative miRNAs in the heart of *RBFox2-cKO* mice; n=3 for each group, *P*-value was labeled individually. The trends of elevation of miRNAs are shown although some *P*-values are not significant.

**Table S1. Expression profiling of 160 microRNAs from *RBFox2*<sup>-/-</sup> mouse cardiomyocytes at 5 -week, 9-week and 18-week age points.**

| <b>miRNA</b> | <b>5W-KO/WT(Log<sub>2</sub>)</b> | <b>9W-KO/WT(Log<sub>2</sub>)</b> | <b>18W-KO/WT(Log<sub>2</sub>)</b> |
|--------------|----------------------------------|----------------------------------|-----------------------------------|
| miR-1983     | 1.34                             | 2.44                             | 2.86                              |
| miR-34a      | 1.82                             | 1.91                             | 2.52                              |
| miR-34b      | 2.09                             | 1.55                             | 2.24                              |
| miR-222      | 1.25                             | 1.50                             | 2.01                              |
| miR-32       | 1.57                             | 1.56                             | 1.60                              |
| miR-34c      | 1.43                             | 1.39                             | 1.92                              |
| miR-208b     | 0.48                             | 0.98                             | 2.70                              |
| miR-221      | 0.96                             | 1.14                             | 1.82                              |
| miR-449a     | 0.70                             | 1.12                             | 1.42                              |
| miR-21a      | 0.92                             | 0.85                             | 1.11                              |
| miR-124a     | 0.45                             | 0.93                             | 1.43                              |
| miR-199a*    | 1.00                             | 0.09                             | 1.32                              |
| miR-215      | 1.02                             | 0.83                             | 0.41                              |
| miR-301a     | 0.44                             | 0.93                             | 0.62                              |
| miR-214      | 0.44                             | 0.03                             | 1.45                              |
| miR-744      | 0.37                             | 0.95                             | 0.46                              |
| miR-23b      | 0.66                             | 0.51                             | 0.53                              |
| miR-484      | 0.73                             | 0.53                             | 0.39                              |
| miR-541      | 0.50                             | 0.70                             | 0.39                              |
| miR-501      | 0.69                             | 0.04                             | 0.83                              |
| miR-361      | 0.01                             | 0.86                             | 0.65                              |
| miR-31       | 0.36                             | 0.50                             | 0.65                              |
| miR-199a     | 0.44                             | 0.42                             | 0.62                              |
| miR-142      | 0.79                             | 0.13                             | 0.54                              |
| miR-103      | 0.57                             | 0.50                             | 0.22                              |
| miR-300      | -0.25                            | 0.45                             | 1.09                              |
| miR-107      | 0.52                             | 0.56                             | 0.19                              |
| miR-27b      | 0.35                             | 0.53                             | 0.36                              |
| miR-23a      | 0.50                             | 0.41                             | 0.31                              |
| miR-142*     | -0.06                            | 0.61                             | 0.62                              |
| miR-339      | 0.46                             | 0.42                             | 0.24                              |
| miR-183      | 0.12                             | 0.23                             | 0.66                              |
| miR-27a      | 0.41                             | 0.27                             | 0.24                              |
| miR-15b      | 0.57                             | 0.25                             | 0.04                              |
| miR-210      | -0.11                            | 0.39                             | 0.50                              |
| miR-33       | -0.25                            | 0.20                             | 0.82                              |
| miR-302b     | 0.91                             | 0.68                             | -0.84                             |
| miR-497      | -0.26                            | 0.59                             | 0.38                              |
| miR-100      | 0.64                             | 0.25                             | -0.19                             |

|           |       |       |       |
|-----------|-------|-------|-------|
| miR-1306  | 0.36  | 0.24  | 0.11  |
| miR-24    | 0.21  | 0.25  | 0.20  |
| miR-320   | 0.15  | 0.47  | 0.04  |
| miR-208a  | 0.44  | 0.44  | -0.24 |
| miR-18a   | 0.44  | 0.15  | -0.04 |
| miR-486   | 0.30  | 0.31  | -0.13 |
| miR-99a   | 0.66  | -0.23 | 0.04  |
| miR-125b  | 0.38  | 0.11  | -0.03 |
| miR-152   | 0.27  | 0.10  | 0.06  |
| miR-494   | 1.28  | -0.07 | -0.80 |
| miR-187   | 0.03  | 0.22  | 0.12  |
| miR-185   | -0.20 | 0.39  | 0.12  |
| miR-378c  | 0.15  | 0.46  | -0.33 |
| miR-148a  | 0.26  | 0.06  | -0.05 |
| miR-127   | 0.82  | -0.09 | -0.53 |
| miR-28a   | 0.52  | -0.29 | -0.04 |
| miR-500   | 0.28  | -0.04 | -0.06 |
| miR-362   | 0.56  | -0.31 | -0.09 |
| miR-29b   | 0.55  | 0.04  | -0.44 |
| miR-423   | -0.75 | 0.68  | 0.21  |
| miR-133b  | -0.04 | 0.31  | -0.16 |
| miR-132   | 0.22  | -0.09 | -0.06 |
| miR-139   | 0.57  | -0.08 | -0.44 |
| miR-350   | 0.26  | -0.25 | 0.01  |
| miR-582   | 0.77  | -0.40 | -0.39 |
| miR-365   | 0.32  | -0.21 | -0.18 |
| Let-7b    | -0.06 | -0.02 | 0.00  |
| miR-133a  | 0.31  | -0.04 | -0.36 |
| miR-652   | -0.08 | 0.28  | -0.33 |
| miR-342   | -0.08 | 0.61  | -0.66 |
| miR-106b  | 0.44  | 0.00  | -0.57 |
| miR-128   | -0.14 | 0.12  | -0.13 |
| miR-193a  | 0.18  | 0.35  | -0.69 |
| miR-302a  | -1.33 | 0.63  | 0.54  |
| miR-98    | 0.18  | 0.06  | -0.41 |
| miR-125a  | 0.47  | -0.55 | -0.10 |
| miR-133b* | 0.13  | 0.02  | -0.34 |
| miR-7a    | 0.18  | 0.28  | -0.71 |
| miR-192   | -0.19 | 0.32  | -0.41 |
| miR-140   | -0.03 | -0.23 | -0.02 |
| miR-191   | -0.29 | 0.27  | -0.28 |
| miR-30a   | -0.11 | 0.41  | -0.60 |
| miR-328   | -0.09 | -0.14 | -0.09 |

|          |       |       |       |
|----------|-------|-------|-------|
| miR-30d  | -0.27 | 0.46  | -0.52 |
| miR-30e  | -0.11 | 0.42  | -0.63 |
| Let-7g   | 0.25  | -0.08 | -0.51 |
| miR-377  | -0.54 | -0.67 | 0.84  |
| miR-130a | -0.27 | -0.03 | -0.13 |
| Let-7c   | -0.05 | -0.29 | -0.12 |
| Let-7i   | 0.00  | -0.21 | -0.27 |
| miR-99b  | -0.11 | -0.03 | -0.35 |
| Let-7e   | 0.06  | -0.09 | -0.49 |
| miR-29c  | 0.26  | -0.12 | -0.67 |
| let-7a   | -0.24 | -0.22 | -0.11 |
| miR-467a | 0.36  | -0.87 | -0.11 |
| miR-29a  | -0.14 | 0.01  | -0.51 |
| miR-155  | -0.69 | 0.23  | -0.18 |
| miR-17   | 0.36  | -0.48 | -0.57 |
| miR-143  | 0.03  | -0.25 | -0.47 |
| miR-206  | 0.13  | -0.18 | -0.66 |
| miR-186  | 0.34  | -0.53 | -0.57 |
| miR-15a  | 0.42  | -0.44 | -0.77 |
| miR-151  | -0.14 | -0.46 | -0.20 |
| miR-374b | 0.40  | -0.36 | -0.83 |
| miR-1a   | -0.24 | -0.26 | -0.30 |
| miR-345  | -0.19 | 0.08  | -0.71 |
| miR-378a | -0.22 | -0.15 | -0.45 |
| miR-16   | -0.29 | 0.09  | -0.63 |
| miR-22   | -0.02 | -0.30 | -0.51 |
| miR-144  | -0.19 | 0.12  | -0.79 |
| miR-223  | -0.55 | 0.51  | -0.83 |
| miR-190b | -0.57 | -0.62 | 0.30  |
| miR-203  | 0.20  | -0.45 | -0.68 |
| Let-7f   | -0.16 | -0.42 | -0.40 |
| miR-20a  | 0.20  | -0.44 | -0.75 |
| miR-187* | -0.46 | 0.10  | -0.65 |
| miR-146a | -0.31 | -0.09 | -0.63 |
| Let-7d   | -0.32 | -0.25 | -0.46 |
| miR-93   | 0.08  | -0.40 | -0.71 |
| miR-351  | -0.20 | -0.07 | -0.78 |
| miR-26a  | 0.12  | -0.51 | -0.70 |
| miR-122  | -0.47 | -0.26 | -0.37 |
| miR-499  | 0.16  | -0.41 | -0.85 |
| miR-190a | 0.36  | -0.73 | -0.73 |
| miR-149  | -0.14 | -0.44 | -0.56 |
| miR-218  | 0.48  | -0.15 | -1.55 |



|           |       |       |       |
|-----------|-------|-------|-------|
| miR-449b  | -0.11 | -0.05 | -1.07 |
| miR-30c   | 0.29  | -0.43 | -1.11 |
| miR-145a  | -0.14 | -0.55 | -0.57 |
| miR-195a  | -0.16 | -0.56 | -0.57 |
| miR-92a   | 0.18  | -0.62 | -0.86 |
| miR-101b  | 0.36  | -0.76 | -0.92 |
| miR-451a  | -0.40 | -0.21 | -0.76 |
| miR-224   | 0.50  | -0.81 | -1.07 |
| miR-101a  | 0.16  | -0.68 | -0.90 |
| miR-19a   | -0.06 | -0.44 | -0.96 |
| miR-26b   | -0.14 | -0.50 | -0.93 |
| miR-322   | -0.16 | -0.82 | -0.59 |
| miR-450a  | -0.08 | -0.77 | -0.74 |
| miR-30a*  | 0.12  | -0.59 | -1.16 |
| miR-467d  | -0.17 | -0.83 | -0.64 |
| Let-7d*   | -0.12 | -0.66 | -0.92 |
| miR-25    | -0.12 | -0.63 | -0.96 |
| miR-194   | -0.20 | -0.72 | -0.82 |
| miR-181b  | -0.09 | -0.40 | -1.26 |
| miR-30b   | 0.05  | -0.63 | -1.17 |
| miR-181d  | -0.26 | -0.33 | -1.17 |
| miR-10b   | -0.72 | -0.37 | -0.70 |
| miR-19b   | -0.28 | -0.61 | -0.98 |
| miR-335   | -0.11 | -0.68 | -1.11 |
| miR-150   | -0.10 | -1.05 | -0.86 |
| miR-30e*  | -0.17 | -0.67 | -1.20 |
| miR-669p  | -0.77 | -0.35 | -1.03 |
| miR-10a   | -0.53 | -0.89 | -0.91 |
| miR-126*  | -0.28 | -1.17 | -0.90 |
| miR-126   | -0.09 | -1.09 | -1.19 |
| miR-145a* | -0.09 | -0.86 | -1.46 |
| miR-181a  | -0.35 | -0.79 | -1.35 |
| miR-181c  | -0.23 | -0.64 | -1.64 |
| miR-204   | 1.36  | -0.54 | -3.57 |
| miR-3102  | -0.88 | -1.16 | -2.22 |

---

**Table S2. List of PCR primers for cloning and RT-PCR.**

| <b>Primers for analyzing <i>Jph2</i> transcripts</b> |                                                         |
|------------------------------------------------------|---------------------------------------------------------|
| E1-E2-F                                              | 5'-GCTATGGCACGGAGACCTAC-3'                              |
| E1-E2-R                                              | 5'-CTTGTCGTTCTTCCACTCGC-3'                              |
| E2-E3-F                                              | 5'-GCGAGTGGGAAGAACGACAAG-3'                             |
| E2-E3-R                                              | 5'-CTGGCTGGTAGAAGTCTGGAG-3'                             |
| E3-E4-F                                              | 5'-CTCCAGACTTCTACCAGCCAG-3'                             |
| E3-E4-R                                              | 5'-GCTCCTGCTCATCTCCAAG-3'                               |
| E4-E5-F                                              | 5'-CTTGGAGGATGAGCAGGAGC-3'                              |
| E4-E5-R                                              | 5'-CATAACAGATGAGGACGGTGTG-3'                            |
| 5U-E1-F                                              | 5'-AGTTGTCAGGAGCGAGGATG-3'                              |
| 5U-E1-R                                              | 5'-GTAGGTCTCCGTGCCATAGC-3'                              |
| 5'UTR-F                                              | 5'-CCAGCGGCTGCTTCAGG-3'                                 |
| 5'UTR-R                                              | 5'-AGGAAGCCGACCGAAGAGA-3'                               |
| <b>Primers for luciferase reporter cloning</b>       |                                                         |
| <i>mJph2</i> -WT-FL-F                                | 5'-CCGCTCGAGCCCTCATCTACCAGTGCCAG-3'                     |
| <i>mJph2</i> -WT-FL-R                                | 5'-ATAGTTTAGCGGCCGCTGCAGTTGAACCTGTGAGC-3'               |
| <i>mJph2</i> -WT-Core-F                              | 5'-TCGAGCACACTGGCTGCTCTCAGCACTGCCGGC-3'                 |
| <i>mJph2</i> -WT-Core-R                              | 5'-GGCCGCCGGCAGTGCTGAGAGCAGCCAGTGTGC-3'                 |
| <i>mJph2</i> -SM1-F                                  | 5'-GGCAGGACCTGTCTTTCTGGTCACGGTAGCAGGTGTCCCAGGAAG-3'     |
| <i>mJph2</i> -SM1-R                                  | 5'-CTTCCTGGGACACCTGCTACCGTGACCAGAAAGACAGGTCCTGCC-3'     |
| <i>mJph2</i> -SM2-F                                  | 5'-ACTGGCTGCTCTCAGAGTGCGCGGGGCTTGGTGGCTT-3'             |
| <i>mJph2</i> -SM2-R                                  | 5'-AAGCCACCAAGCCCCGCGCACTCTGAGAGCAGCCAGT-3'             |
| <i>hJPH2</i> -WT-FL-F                                | 5'-CCGCTCGAGCCGTCGCTTACCAGA-3'                          |
| <i>hJPH2</i> -WT-FL-R                                | 5'-TAGTTTAGCGGCCGCCCGTGAGCAGATGC-3'                     |
| <i>hJPH2</i> -WT-Core-R                              | 5'-ATAGTTTAGCGGCCGCCACAGGCACCGTGGGA-3'                  |
| <i>hJPH2</i> -SM1-F                                  | 5'-GGACATGAGGACCCGTCTTTTGGTCACGGTGGCAGGGTGGCCAAAGAGG-3' |
| <i>hJPH2</i> -SM1-R                                  | 5'-CCTCTTTGGCCACCCTGCCACCGTGACCAAAAAGACGGGTCTCATGTCC-3' |
| <b>Primers for RT-PCR</b>                            |                                                         |
| miR-34a-5p-F                                         | 5'-TGGCAGTGTCTTAGCTGGTTG-3'                             |
| miR-221-3p-F                                         | 5'-AGCTACATTGTCTGCTGGG-3'                               |
| miR-222-3p-F                                         | 5'-AGCTACATCTGGCTACTGGG-3'                              |
| miR-124-3p-F                                         | 5'-TAAGGCACGCGGTGAATGC-3'                               |
| Universal-miR-R                                      | From miScript SYBR Green PCR Kit (Qiagen, 218073)       |
| <i>U6</i> -F                                         | 5'-CTCGCTTCGGCAGCAC-3'                                  |
| <i>U6</i> -R                                         | 5'-AACGCTTCACGAAT TTGCGT-3'                             |
| <i>RBFox2</i> -RT-F                                  | 5'-AACCAGGAGCCAACAACAAC-3'                              |
| <i>RBFox2</i> -RT-R                                  | 5'-ACTCCCGTAGAGGGTCAGGT-3'                              |
| <i>Jph2</i> -RT-F                                    | 5'-AGAGGCAGCAGAACAGGC-3'                                |
| <i>Jph2</i> -RT-R                                    | 5'-CTCCAGCAAGCTCTCAGAG-3'                               |
| <i>Anf</i> -RT-F                                     | 5'-AGGCAGTCGATTCTGCTTGA-3'                              |
| <i>Anf</i> -RT-R                                     | 5'-CGTGATAGATGAAGGCAGGAAG-3'                            |
| <i>Bnp</i> -RT-F                                     | 5'-TAGCCAGTCTCCAGAGCAATTC-3'                            |
| <i>Bnp</i> -RT-R                                     | 5'-TTGGTCCTTCAAGAGCTGTCTC-3'                            |
| <i>Cav3</i> -RT-F                                    | 5'-GCGACCCCAAGAACATCAAT-3'                              |
| <i>Cav3</i> -RT-R                                    | 5'-GGAGATACAGGCGAACAGGA-3'                              |
| <b>Primers for alternative splicing qPCR</b>         |                                                         |
| <i>Pdlim5</i> -E3-E9-F                               | 5'-GGCTCCTTGAATATGACTCTACA-3'                           |
| <i>Pdlim5</i> -E3-E9-R                               | 5'-GTCCTCAGTGTCTCAATCAG-3'                              |
| <i>Mef2a</i> -SP2-F                                  | 5'-GTGGTGGCAGTCTTGAATG-3'                               |
| <i>Mef2a</i> -SP2-R                                  | 5'-AGAGGTTGAGTGGCTTGAGAA-3'                             |
| <i>Ldb3</i> -4593-F                                  | 5'-CGGAAGATGAGGCTGATGAGT-3'                             |
| <i>Ldb3</i> -4593-R                                  | 5'-CGGATGCTGGCAGTGGTTA-3'                               |
